# Supplementary material
Source: Springer Nature journal article supplement (https://www.springermedizin.de/resource/supplementary/12958_2010_867_MOESM7_ESM.pdf/9569054)

T VE 0 1 2 3 4 5 6 7 8/9 VD C

Bp

ADAM 1

-205

1.3 0.6 0.7 0.6 0.3 0.2 0.7 0.6 0.9 0.8 0.4 0.5

ADAM 2

-237

1.6 0.7 0.1 0.2 0.1 0.2

L19

-172

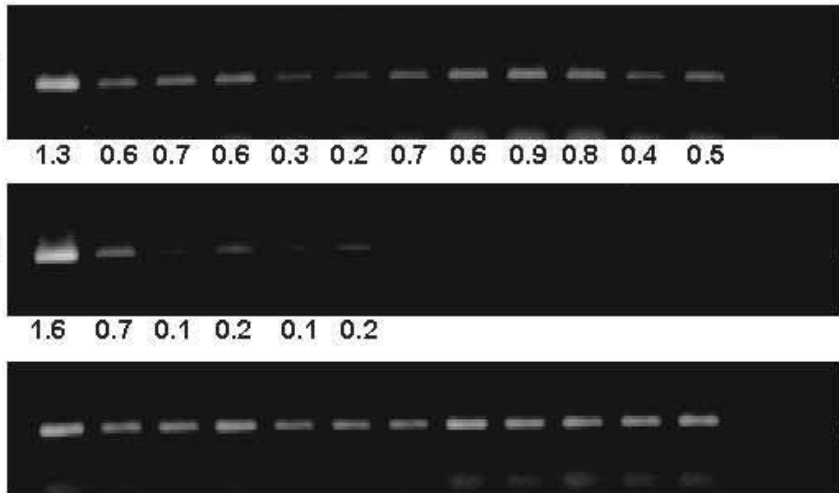

Supplement: MOESM7 [file 9569054]
